# Supplementary material
Source: publisher site journal article supplement (https://www.spandidos-publications.com/2613/downloadSupplementary)
Supplement: Supplementary file 1 [file downloadSupplementary]

## Sheet: Table SXI
Table SXI. Multivariate Cox proportional hazards regression of miR150 on patients' survival grouped by HER2 status.
Variable	HER2 negative				HER2 positivea
	Nb	Median (Q1-Q3)c	HR (95% CI)	P-valued	Nb	Median (Q1-Q3)c	HR (95% CI)	P-valued
Overall survival
miR150 (continuous)	328		0.67 (0.55-0.82)	< 0.001	75		-	-
miR150 (categorical)e
Low	228	29.89 (15.12-53.02)	Reference		55	29.01 (14.38-55.12)	Reference
High	100	48.53 (24.87-79.20)	0.27 (0.10-0.72)	0.009	20	40.42 (19.21-68.09)	-	-
Disease-free survival
miR150 (continuous)	310		0.76 (0.62-0.93)	0.008	69		-	-
miR150 (categorical)e
Low	213	27.00 (14.49-48.29)	Reference		50	23.54 (13.17-55.21)	Reference
High	97	43.30 (23.46-78.35)	0.53 (0.23-1.23)	0.139	19	41.72 (19.20-72.93)	-	-
a Only one death and no recurred or progressed in high-miR150 group, unable to perform Cox regression.
b Number of samples, some of these variables have missing values.
c Data were shown as median (Q1-Q3 quantiles) overall or disease-free survival months.
d P-values were adjusted for diagnosis age, ER status, PR status, copy number alterations, lymph nodes examined number, mutation count and stage.
e Low: miR150 <9.55, High: miR150 ≥9.55.
